# Supplementary material
Source: PubMed Central journal article supplement (PMC2607176)
Supplement: supp_74_24_7546__1.pdf [file supp_74_24_7546__1.pdf]

# Supplemental material

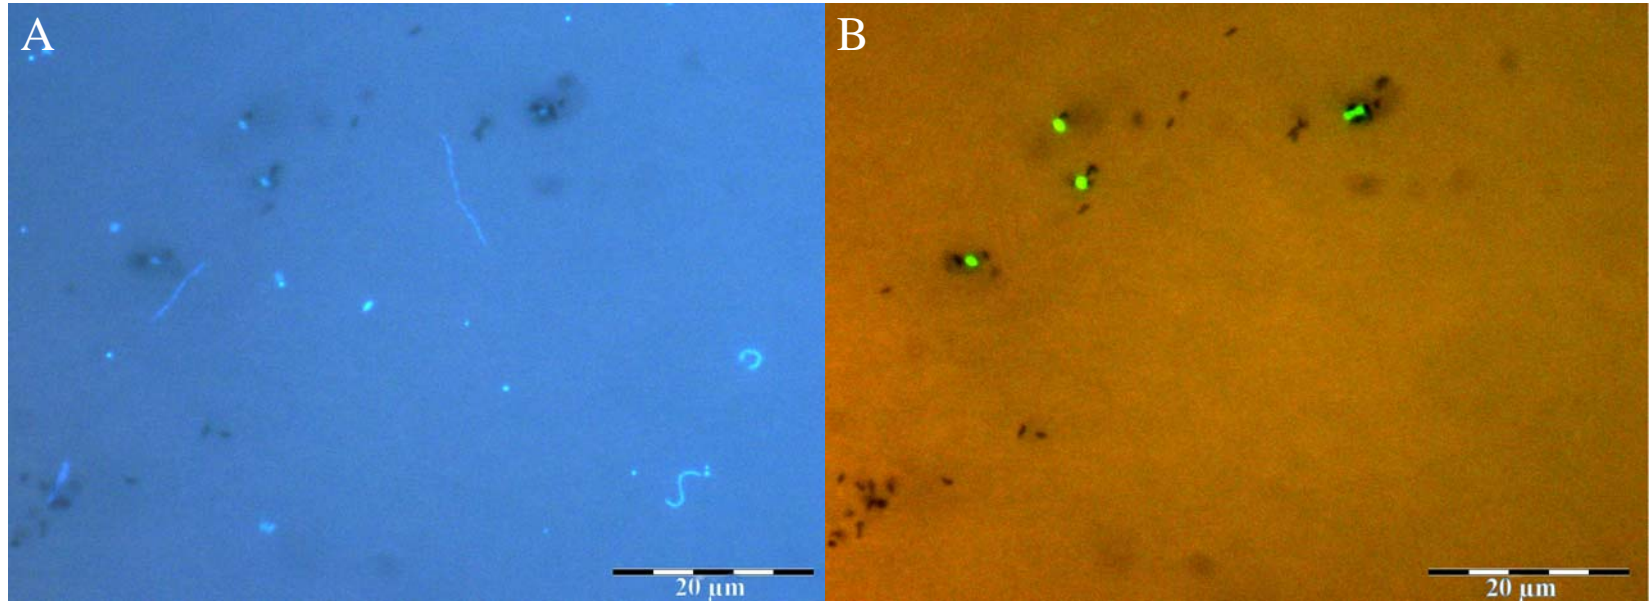

Fig. S1 Images of whole cell hybridization combined with microautoradiography of the Black Sea (125m depth) incubated with [<sup>14</sup>C]bicarbonate. A DAPI-stained bacteria; B bacteria hybridized with oligonucleotide probe EPS914 specific for *Epsilonproteobacteria*. Accumulation of dark silver grains around the cells indicate dark CO<sub>2</sub> fixation activity. Images show the same microscopic view.
